# Supplementary material
Source: PubMed Central journal article supplement (PMC6721940)
Supplement: supp_RA119.008649_144442_1_supp_360688_p4f444.pdf [file supp_RA119.008649_144442_1_supp_360688_p4f444.pdf]

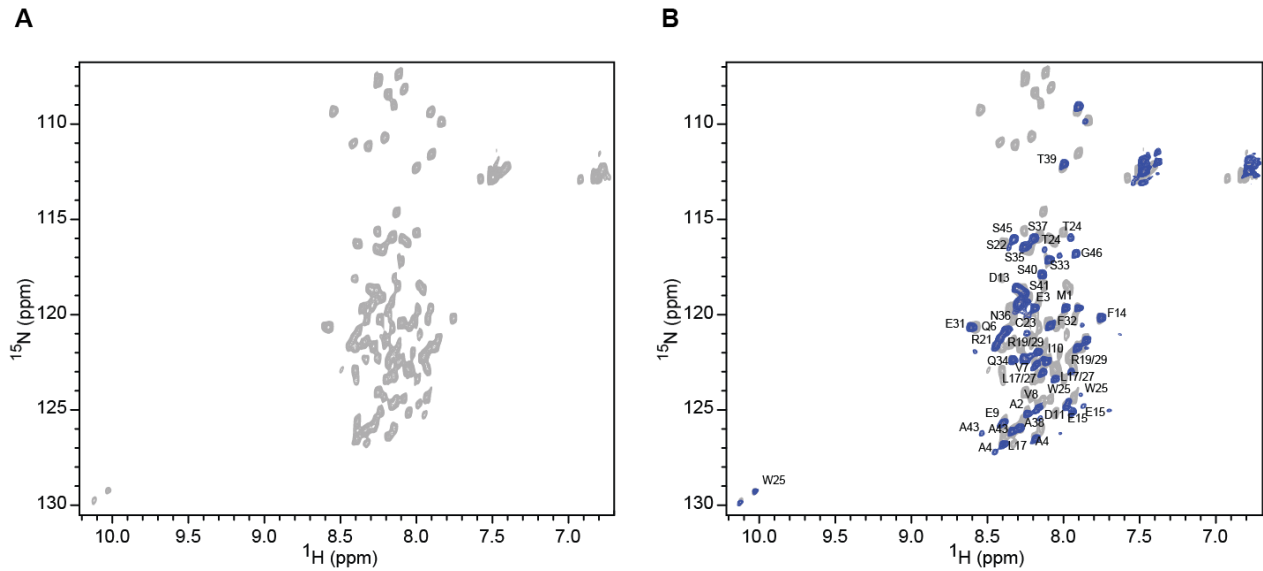

**Figure S1. Comparison of 2D  $^1\text{H}/^{15}\text{N}$  NMR spectra of NTD $\Delta$  with the full length NTD (A) 2D  $^1\text{H}/^{15}\text{N}$  NMR spectra of FOXO1's NTD. Complete assignment of all amino acids was not possible due to overlaps of chemical shifts. (B) All  $^1\text{H}/^{15}\text{N}$  chemical shifts are collapsed around 7.5 – 8.5 ppm in the  $^1\text{H}$  dimension, for superimposed spectra of full length NTD (grey) and NTD $\Delta$  (blue), indicative of an overall disordered nature of both proteins.**

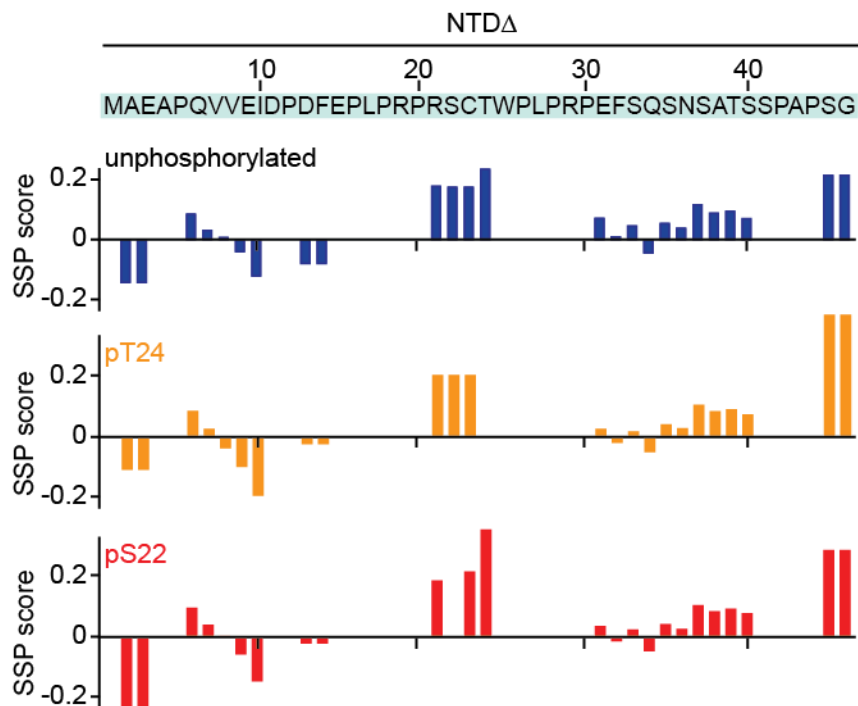

**Figure S2. Secondary structure propensity of NTDΔ** Secondary structure propensity (SSP) scores for NTDΔ in different phosphorylation states based on the C $\alpha$  and C $\beta$  chemical shifts with five-residue weighted averaging. Positive scores indicate an  $\alpha$ -helix and negative scores suggest a  $\beta$ -sheet propensity. Prolines and amino acids directly preceding prolines were excluded in the SSP analysis as they are not visible in the  $^1\text{H}/^{15}\text{N}$  HMQC spectra. The unphosphorylated NTDΔ (shown in blue) contains a largely unstructured character with weak  $\alpha$ -helical propensities for amino acids 21-25 (average SSP score of 0.19), a region mediating 14-3-3 interactions. Additionally, amino acids 35-40 had an average SSP score of 0.08, also indicating a weak  $\alpha$ -helical propensity. Yet, the overall SSP scores of NTDΔ suggested a predominantly unfolded polypeptide chain. The SSP scores of NTDΔ-pT24 (shown in orange) and NTDΔ-pS22 (shown red) were overall comparable to the unphosphorylated NTDΔ, showing no detectable structural changes upon phosphorylation.

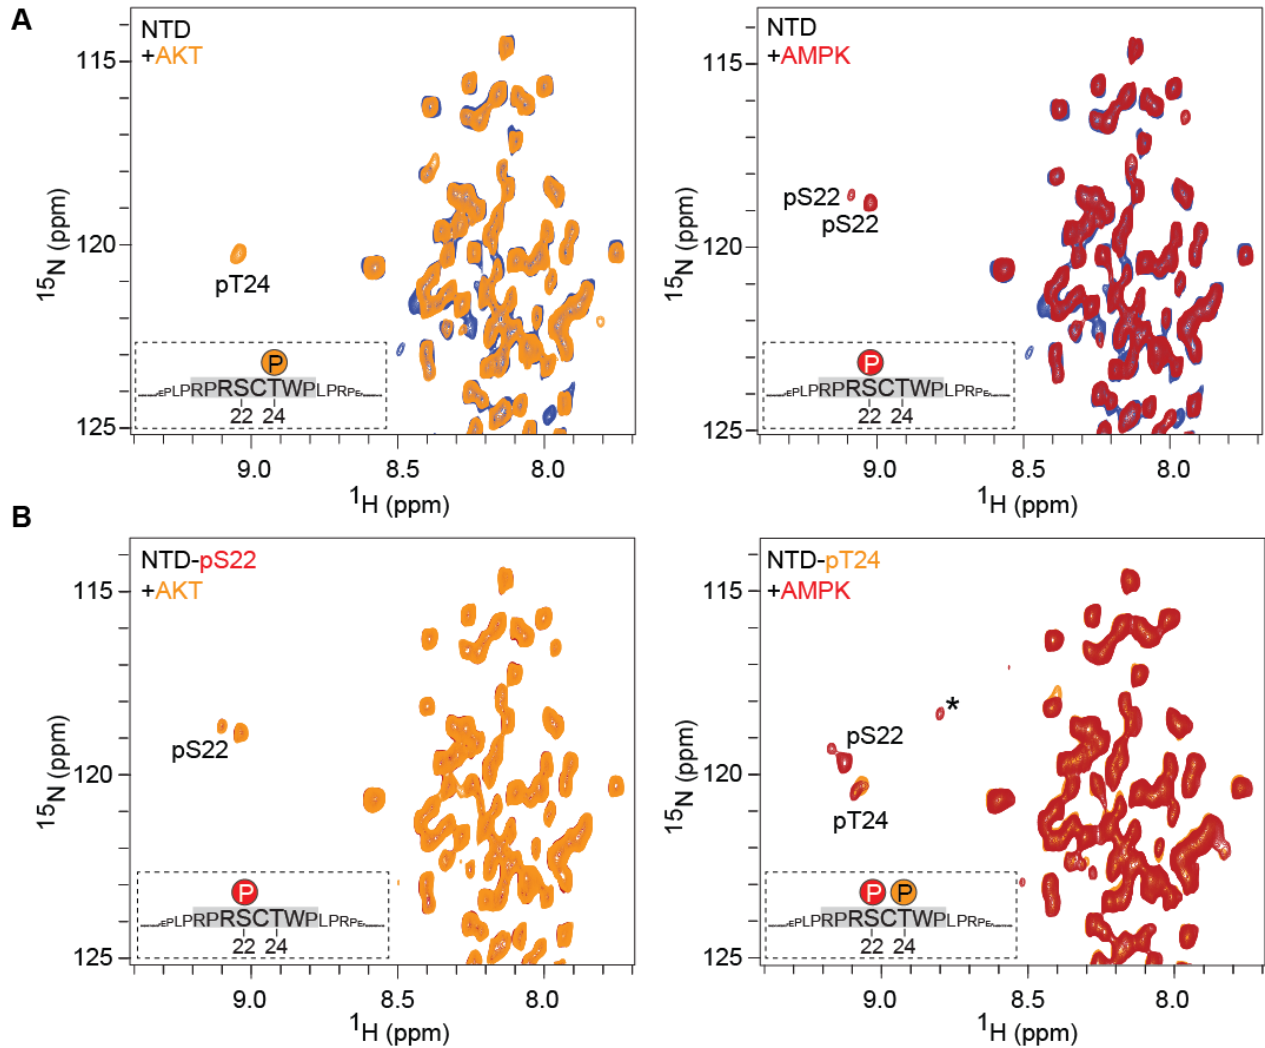

**Figure S3. Phosphorylation of the NTD by AKT and AMPK** (A) 2D  $^1\text{H}/^{15}\text{N}$  HMQC NMR spectra of the NTD incubated for 3 h with purified AKT (in orange) or AMPK (in red) to assess T24 and S22 phosphorylation by AKT and AMPK, respectively. Two peaks for pS22 indicate dual conformations. (B) 2D  $^1\text{H}/^{15}\text{N}$  HMQC NMR spectra of the pre-phosphorylated NTD incubated with the indicated kinases for 4.5 h. NTD-pS22 with AKT to monitor T24 phosphorylation (in orange) and NTD-pT24 with AMPK to analyze S22 phosphorylation (in red). AMPK phosphorylated S22 on NTD-pT24 while AKT could not phosphorylate T24 on NTD-pS22 as observed for the truncated NTD (NTD $\Delta$ ). Additionally, a weak peak appeared at 8.78/118.35 ( $^1\text{H}/^{15}\text{N}$ ) ppm when NTD-pT24 was incubated with AMPK indicated by an asterisk. Peptide mapping by LC-MSMS revealed that either S62 or S72 was also weakly phosphorylated by AMPK.

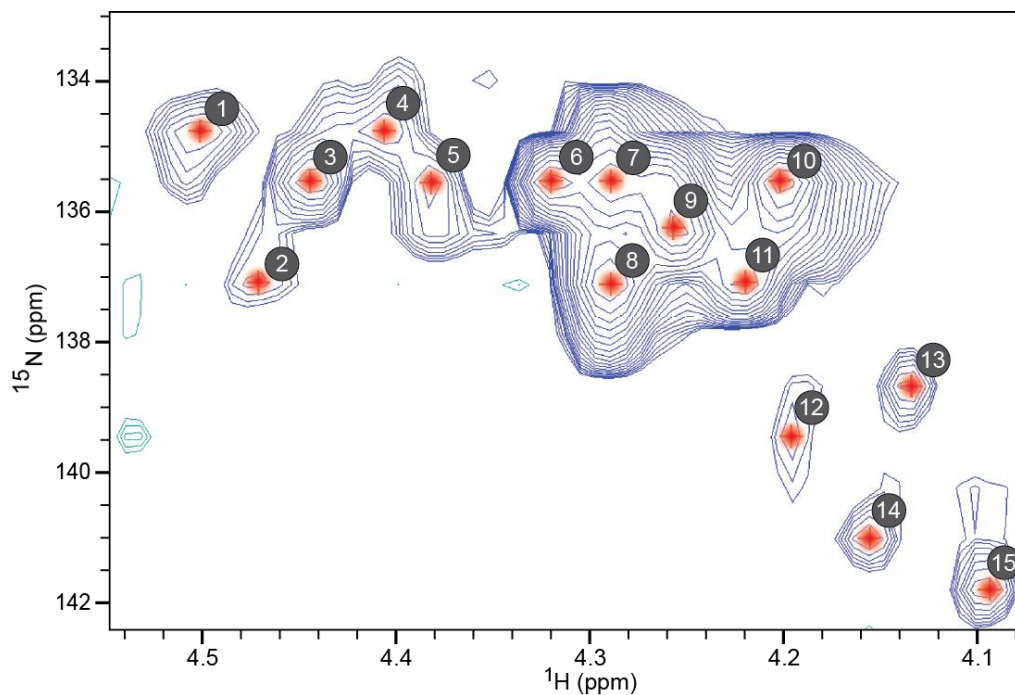

**Figure S4. Isomerization analysis of prolines in NTDA** Two-dimensional  $\text{H}\alpha(\text{C}\alpha)\text{N}$  NMR projections of  $^{15}\text{N}/^{13}\text{C}$ -doubly labeled NTDA centered on the  $\text{H}\alpha/\text{N}$  region of proline residues. 15  $\text{H}\alpha/\text{N}$  peaks were identified by automatic peak-picking. NTDA contains 10 prolines suggesting that at least five prolines are present in both cis and trans conformations.

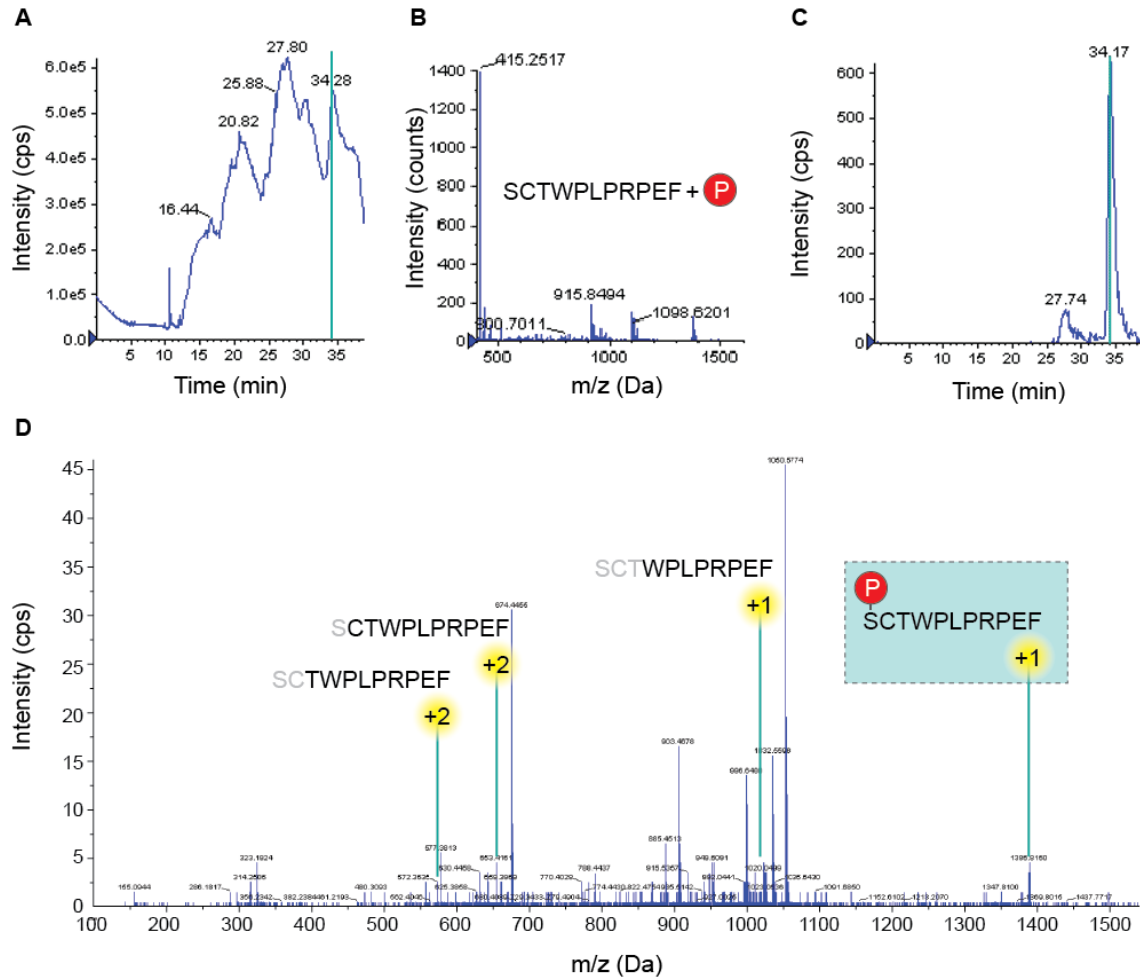

**Figure S5. Analysis of phosphorylation sites of AMPK in the NTD of FOXO1 by LC-MSMS (A)** Total ion count chromatogram of the digested NTD incubated with AMPK. **(B)** M/z spectra of phosphorylated peptide fragments (MS). **(C)** Extracted ion count chromatogram. **(D)** m/z spectrum of product ions (MSMS). The peptide fragments corresponding to double charged TWPLRPEF and CTWPLRPEF suggested that S22 has been the site of phosphorylation.

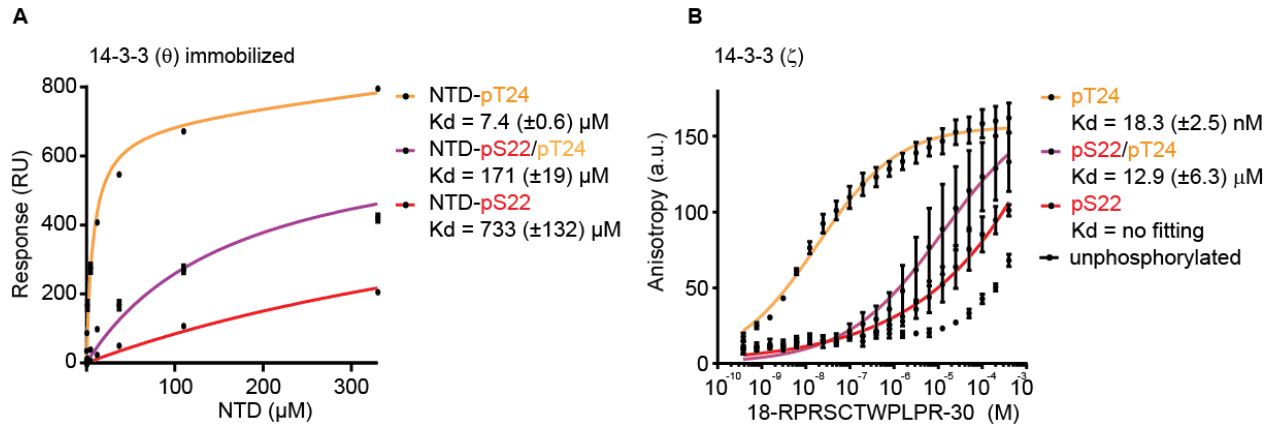

**Figure S6. Phosphorylation of S22 in the NTD of FOXO1 prevents 14-3-3 interactions** (A) Surface plasmon resonance (SPR) binding analysis of 14-3-3  $\theta$  and the NTD of FOXO1 phosphorylated at the indicated residues. NTD-pT24 served as positive control and the unphosphorylated NTD was used as linear component for data correction. Data are expressed as mean  $\pm$  SD of technical triplicates from one representative experiment. (B) Fluorescence Anisotropy binding analysis of interactions between 14-3-3  $\zeta$  and the FOXO1 peptide (18-RPRSCTWPLPR-30) in different phosphorylation states. Data are expressed as means  $\pm$  SD from three independent experiments and fitted with Prism (Specific binding with Hill slope).

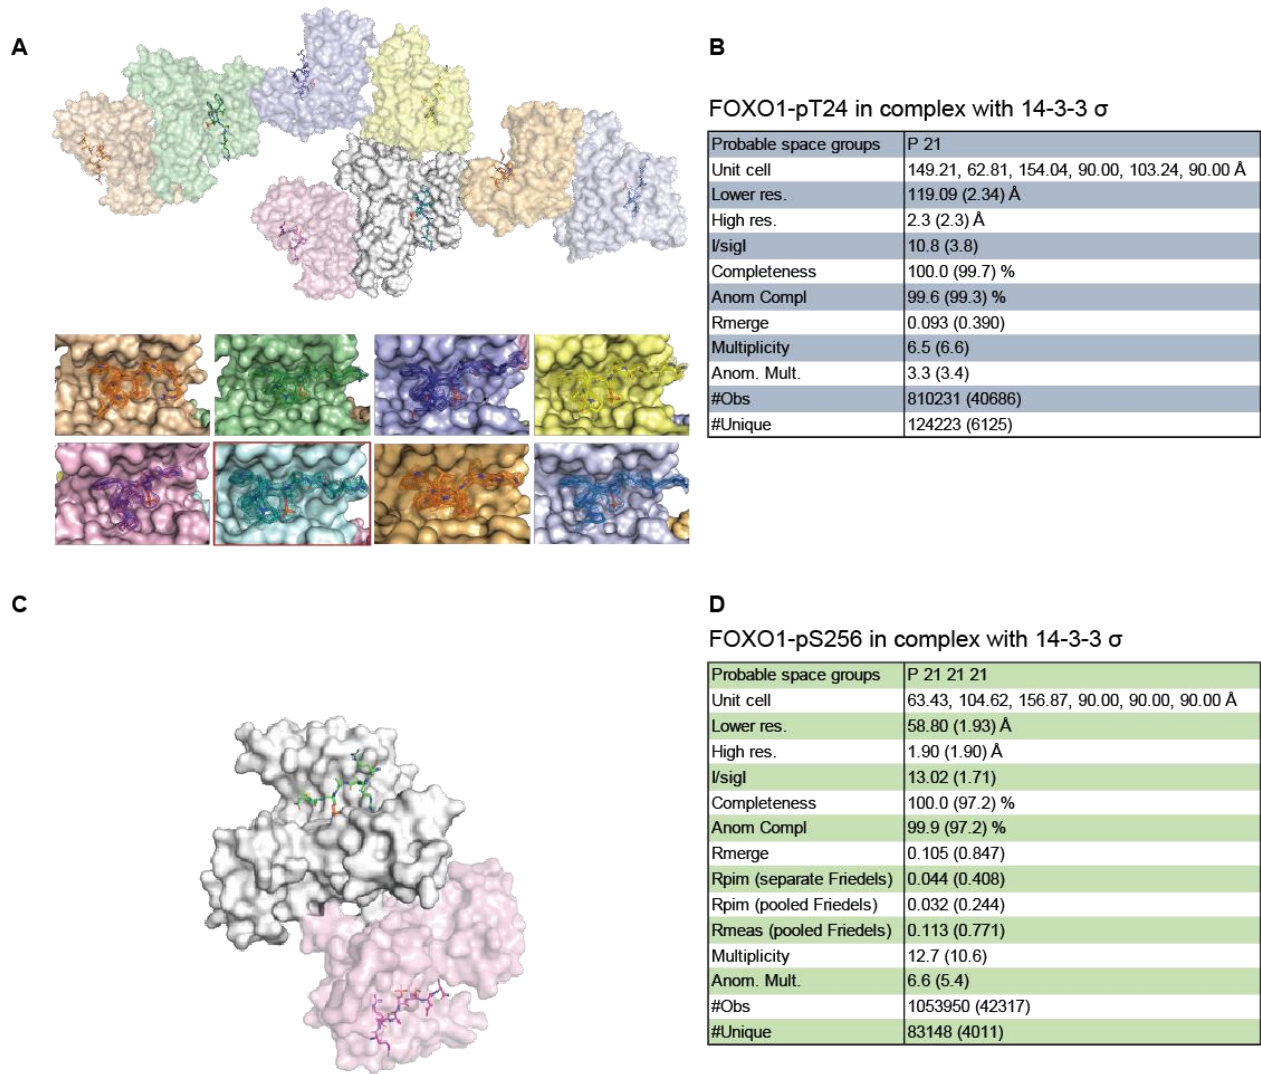

**Figure S7. Detailed overview of the crystal structures obtained for FOXO1-pT24 and FOXO1-pS256 in complex with 14-3-3  $\sigma$**  (A) Crystal structure of FOXO1-pT24 in complex with 14-3-3  $\sigma$ . Shown is the asymmetric unit with eight 14-3-3 monomers (surface representation) and the peptide (stick representation). (B) Crystallographic data collection and refinement statistics for FOXO1-pT24 in complex with 14-3-3  $\sigma$ . (C) Crystal structure of FOXO1-pS256 in complex with 14-3-3  $\sigma$ . Shown is the asymmetric unit with two 14-3-3 monomers (surface representation) and the peptide (stick representation). (D) Crystallographic data collection and refinement statistics for FOXO1-pS256 in complex with 14-3-3  $\sigma$ .





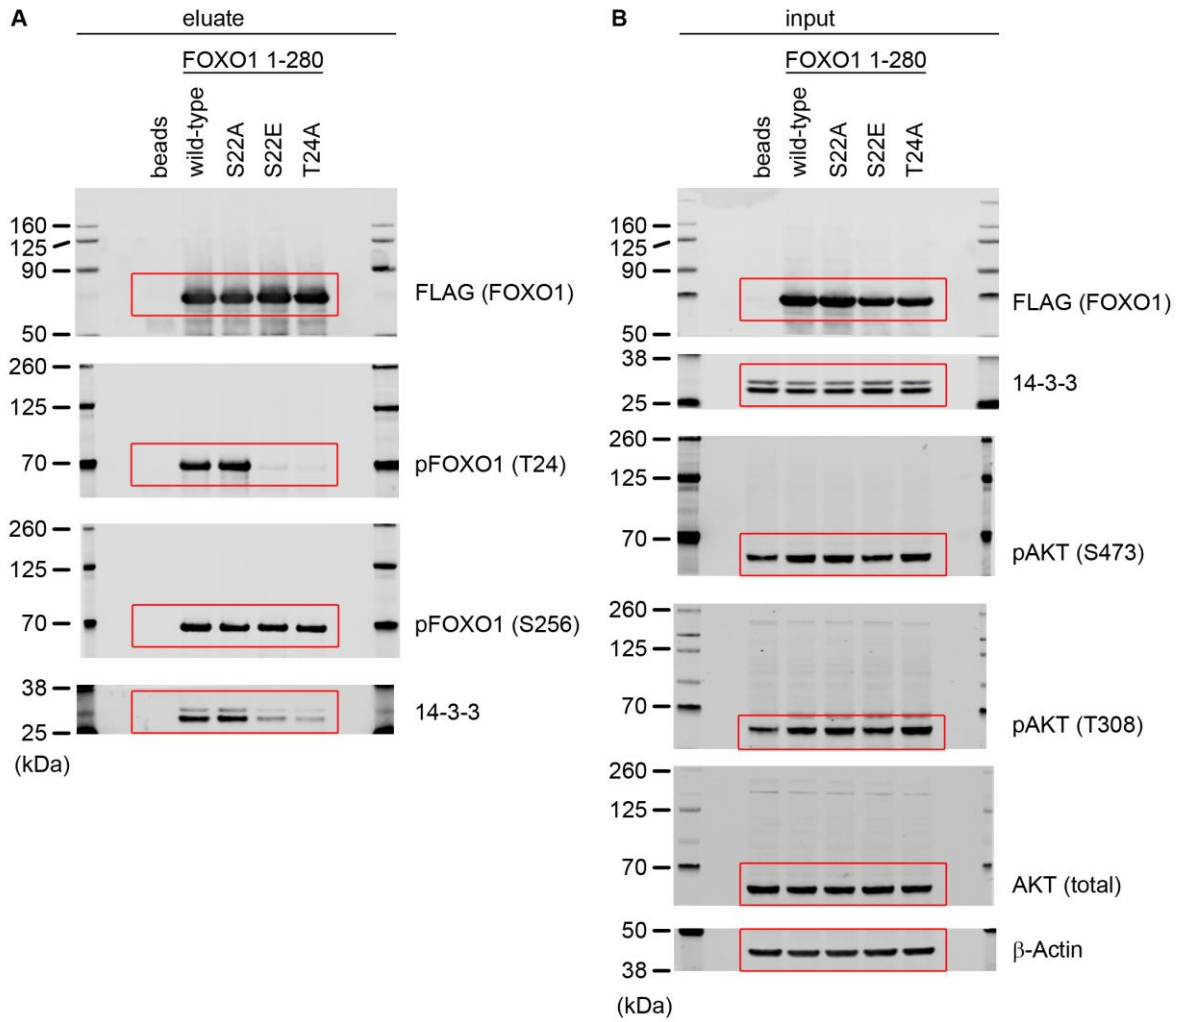

**Figure S9. Uncropped immunoblots of Figure 4** (A) Western blot scans of the eluates from the immunoprecipitation. (B) Uncropped western blot scans of input samples. Cropped areas are indicated by red boxes. The Chameleon Duo Pre-stained Protein Ladder from LI-COR (#928-60000) was used to monitor molecular weights in the near-infrared channels (700 nm and 800 nm).
